# Supplementary material
Source: PubMed Central journal article supplement (PMC7318032)
Supplement: AAC.00296-20-s0001.pdf [file AAC.00296-20-s0001.pdf]

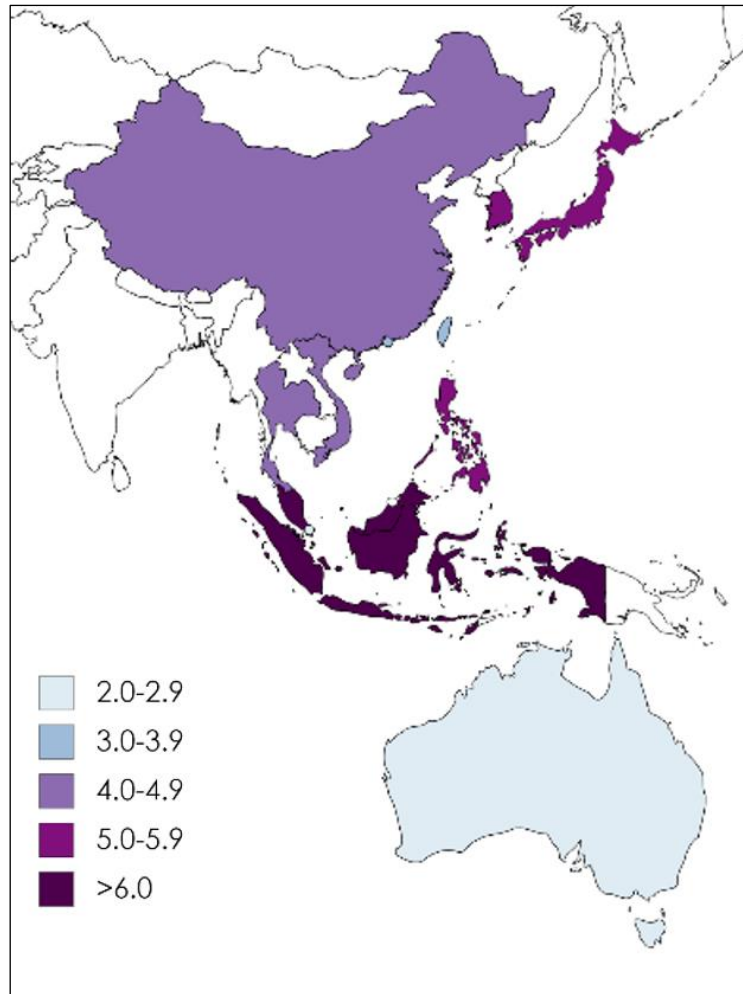

**Figure S1.** Mean cumulative resistance score by study country.

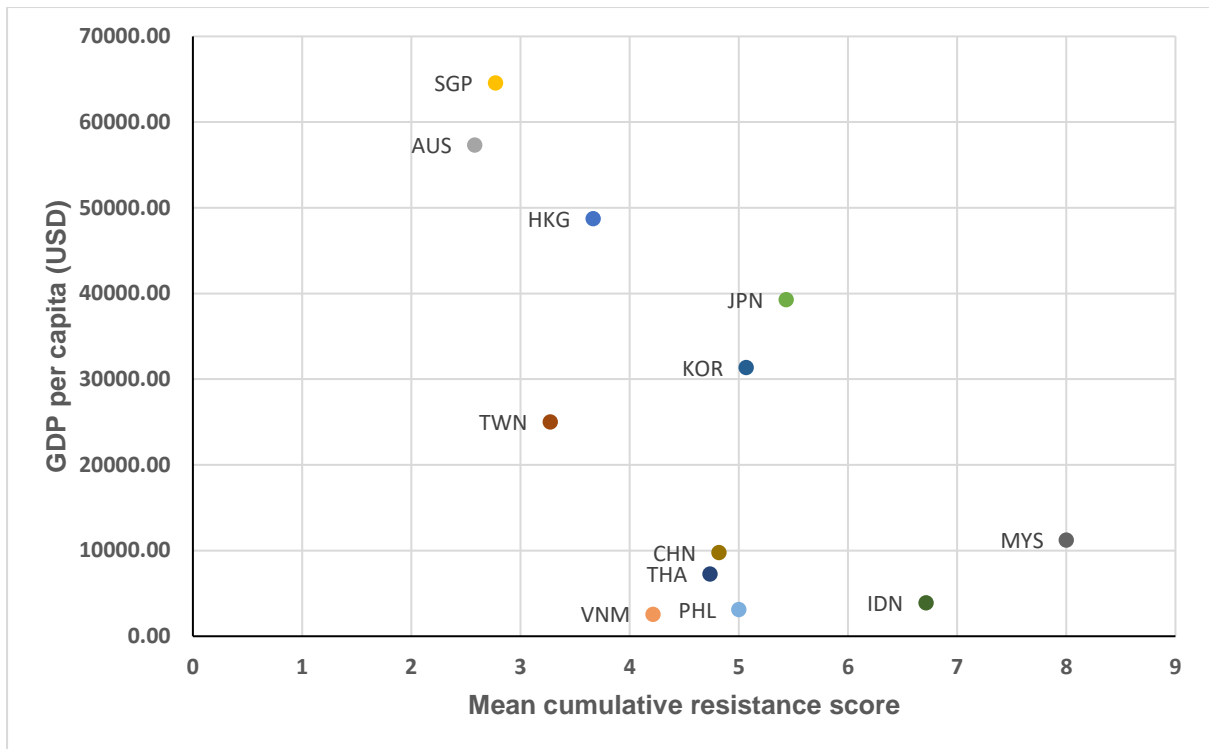

**Figure S2.** Mean cumulative resistance score plotted against gross domestic product (GDP) per capita (from World Bank), for each study country.
